# Supplementary material for: Catalysis-dependent selenium incorporation and migration in the nitrogenase active site iron-molybdenum cofactor
Source: eLife. 2015 Dec 16;4:e11620. doi: 10.7554/eLife.11620 (PMC4755756; doi:10.7554/eLife.11620)
Supplement: Figure 1—source data 1. — DOI: http://dx.doi.org/10.7554/eLife.11620.004 [file elife-11620-fig1-data1.xlsx]

## Sheet: Sheet1
Figure 1
D)
t/min	umol C2H4 / mg (Av1)	umol C2H4 / mg (Av1-Se)
0	0.0128	0.0128
0.01667	0.027	0.0154
0.03333	0.0396	0.0162
0.05	0.0486	0.01688
0.06667	0.0608	0.0216
0.08333	0.072	0.0252
0.1	0.0846	0.027
0.11667	0.106	0.0315
0.13333	0.1332	0.0426
0.15	0.1638	0.0558
0.16667	0.1818	0.0738
0.3333	0.4586	0.23908
0.5	0.9828	0.601209
1	2.16066	1.9299
2	4.5873	4.44836
5	12.3498	12.009
10	24.3459	23.2802
D) inset
t/s	nmol C2H4 / mg (Av1)	nmol C2H4 / mg (Av1-Se)
1	27	15.4
2	39.6	16.2
3	48.6	16.88
4	64.8	21.6
5	72	25.2
6	84.6	27
7	108	31.5
8	133.2	46.8
9	163.8	55.8
10	181.8	73.8
E)
t/min	nmol NH4+ / mg (Av1)	nmol NH4+ / mg (Av1-Se)
0	0	0
0.5	340.691	15.1872
1	725.258	291.088
2	1471.04	1297.01
5	3741.87	3844.89
10	6603.52	6444.44
