# Supplementary material for: Catalysis-dependent selenium incorporation and migration in the nitrogenase active site iron-molybdenum cofactor
Source: eLife. 2015 Dec 16;4:e11620. doi: 10.7554/eLife.11620 (PMC4755756; doi:10.7554/eLife.11620)
Supplement: Figure 1—source data 2. — DOI: http://dx.doi.org/10.7554/eLife.11620.005 [file elife-11620-fig1-data2.xlsx]

## Sheet: Sheet1
Figure 1 Supplement 1
mM (KSeCN)	nmol CH4*min-1*mg (Av1)-1
0	0
0.05	0.80269
0.1	1.07554
0.2	1.44104
0.5	1.82714
1	1.88021
2	1.80259
5	1.10044
mM (KSCN)	nmol CH4*min-1*mg (Av1)-1
0	0
0.05	1.77052
0.1	4.15642
0.2	4.61855
0.5	7.4543
1	10.3926
2	19.4159
5	23.6959
