# Supplementary material for: Catalysis-dependent selenium incorporation and migration in the nitrogenase active site iron-molybdenum cofactor
Source: eLife. 2015 Dec 16;4:e11620. doi: 10.7554/eLife.11620 (PMC4755756; doi:10.7554/eLife.11620)
Supplement: Figure 1—source data 3. — DOI: http://dx.doi.org/10.7554/eLife.11620.006 [file elife-11620-fig1-data3.xlsx]

## Sheet: Sheet1
Figure 1 Supplement 2
A)
mM (KSCN)	1/v, (umol C2H4/min)-1 for 20uL C2H2	1/v, (umol C2H4/min)-1 for 30uL C2H2	1/v, (umol C2H4/min)-1 for 40uL C2H2	1/v, (umol C2H4/min)-1 for 60uL C2H2	1/v, (umol C2H4/min)-1 for 100uL C2H2	1/v, (umol C2H4/min)-1 for 500uL C2H2
0	24.2234	19.6775	12.8517	8.72549	6.66593	3.45741
1	26.9091	21.6996	14.0524	9.54717	6.86396	3.59165
2	28.3355	22.155	14.6528	10.648	7.00344	3.74488
3	29.2555	23.5919	14.5547	10.4496	7.62619	4.10799
4	32.2034	24.846	16.3351	10.033	7.32427	4.17824
B)
uM (KSeCN)	1/v, (umol C2H4/min)-1 for 20uL C2H2	1/v, (umol C2H4/min)-1 for 30uL C2H2	1/v, (umol C2H4/min)-1 for 40uL C2H2	1/v, (umol C2H4/min)-1 for 60uL C2H2	1/v, (umol C2H4/min)-1 for 100uL C2H2	1/v, (umol C2H4/min)-1 for 500uL C2H2
0	21.3742	16.8078	10.8612	8.83343	6.66593	3.45741
50	23.0806	19.3249	13.6621	10.4468	7.01554	4.02418
100	27.1127	19.0598	14.7268	11.2359	7.90537	3.45741
200	31.1593	25.5997	16.5507	12.8348	8.60803	5.20318
500	43.2458	35.5523	21.3724	16.8109	12.1848	7.16013
C)
mM (KSCN)	nmol C2H2*min-1*mg(Av1)-1
0	2550
0.075	2541.32
0.1	2539.1
0.5	2523.74
1	2515.9
5	2068.23
10	1755.66
15	1225.81
20	1241.84
mM (KSeCN)	nmol C2H2*min-1*mg(Av1)-1
0	2550
0.075	2247.34
0.1	1919.8
0.5	832.037
1	628.026
5	62.0415
10	4.07747
15	4.61843
20	3.28787
