# Supplementary material for: Catalysis-dependent selenium incorporation and migration in the nitrogenase active site iron-molybdenum cofactor
Source: eLife. 2015 Dec 16;4:e11620. doi: 10.7554/eLife.11620 (PMC4755756; doi:10.7554/eLife.11620)
Supplement: Figure 1—source data 4. — DOI: http://dx.doi.org/10.7554/eLife.11620.007 [file elife-11620-fig1-data4.xlsx]

## Sheet: Sheet1
Figure 1 Supplement 3
mM (KSeCN)	nmol H2*min-1*mg (Av1)-1
0	2411.33
0.5	1451.52
1	1240.43
5	953.679
10	905.094
mM (KSCN)	nmol H2*min-1*mg (Av1)-1
0	2411.33
0.5	2353.96
1	2179.47
5	1839.65
10	1393.33
