# Supplementary figures and images for: Catalysis-dependent selenium incorporation and migration in the nitrogenase active site iron-molybdenum cofactor
Source: eLife journal article supplement (doi:10.7554/elife.11620), 2015-12-16

Figure 1-figure supplement 2.

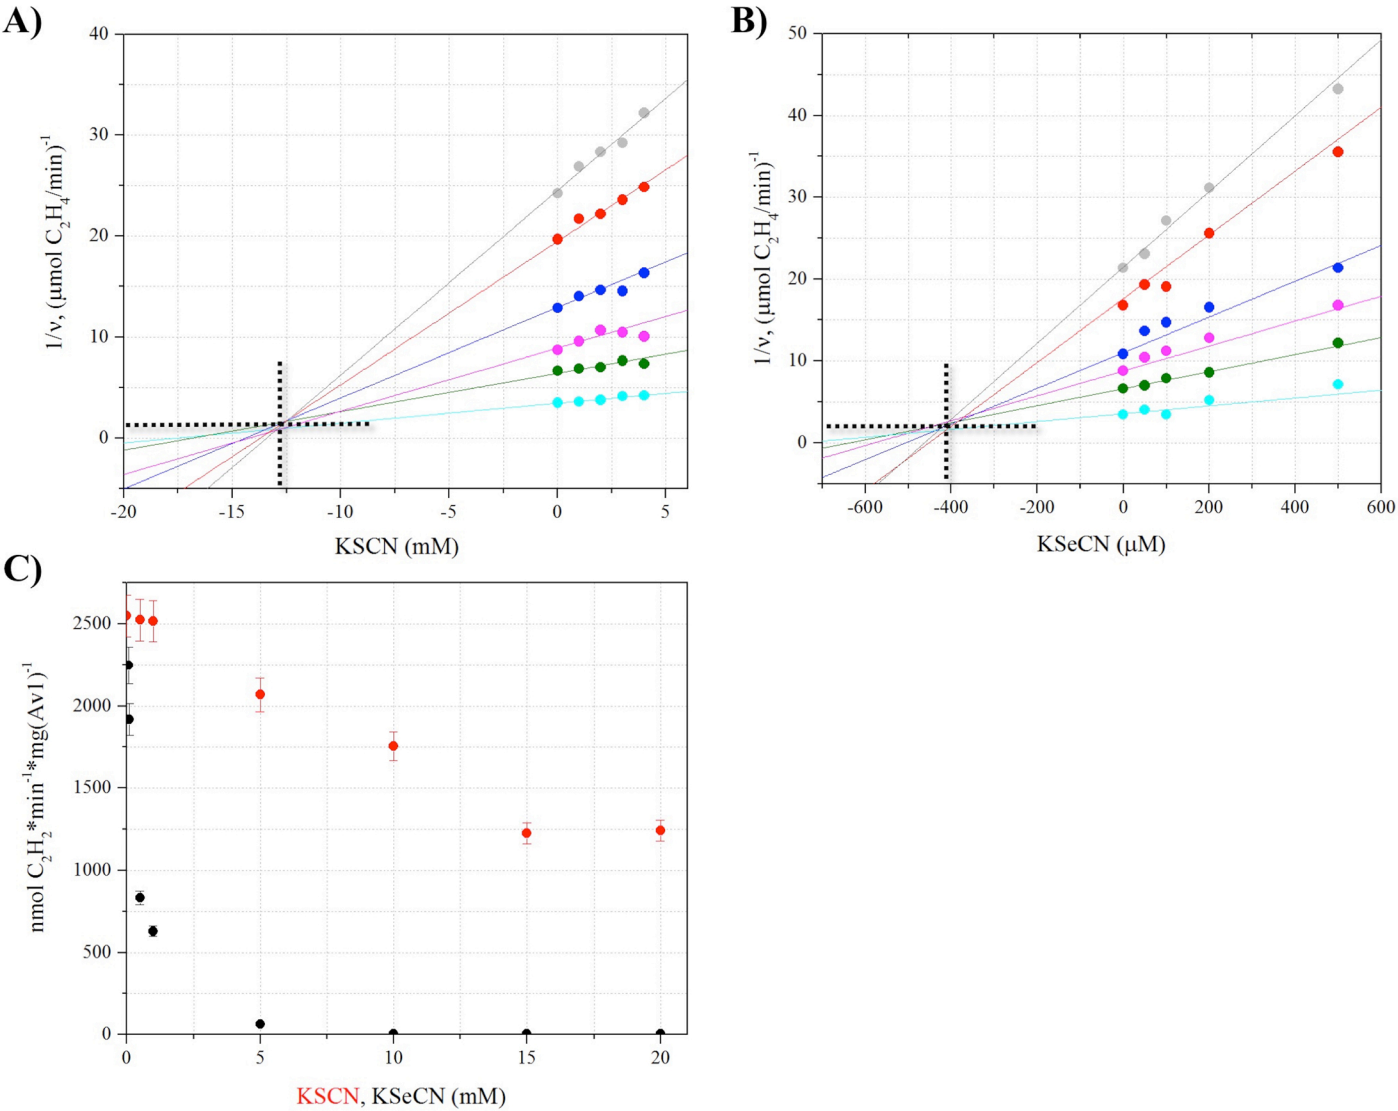

Supplement: supp [file elife-11620-supp-v1.zip]

Figure 1-figure supplement 1.

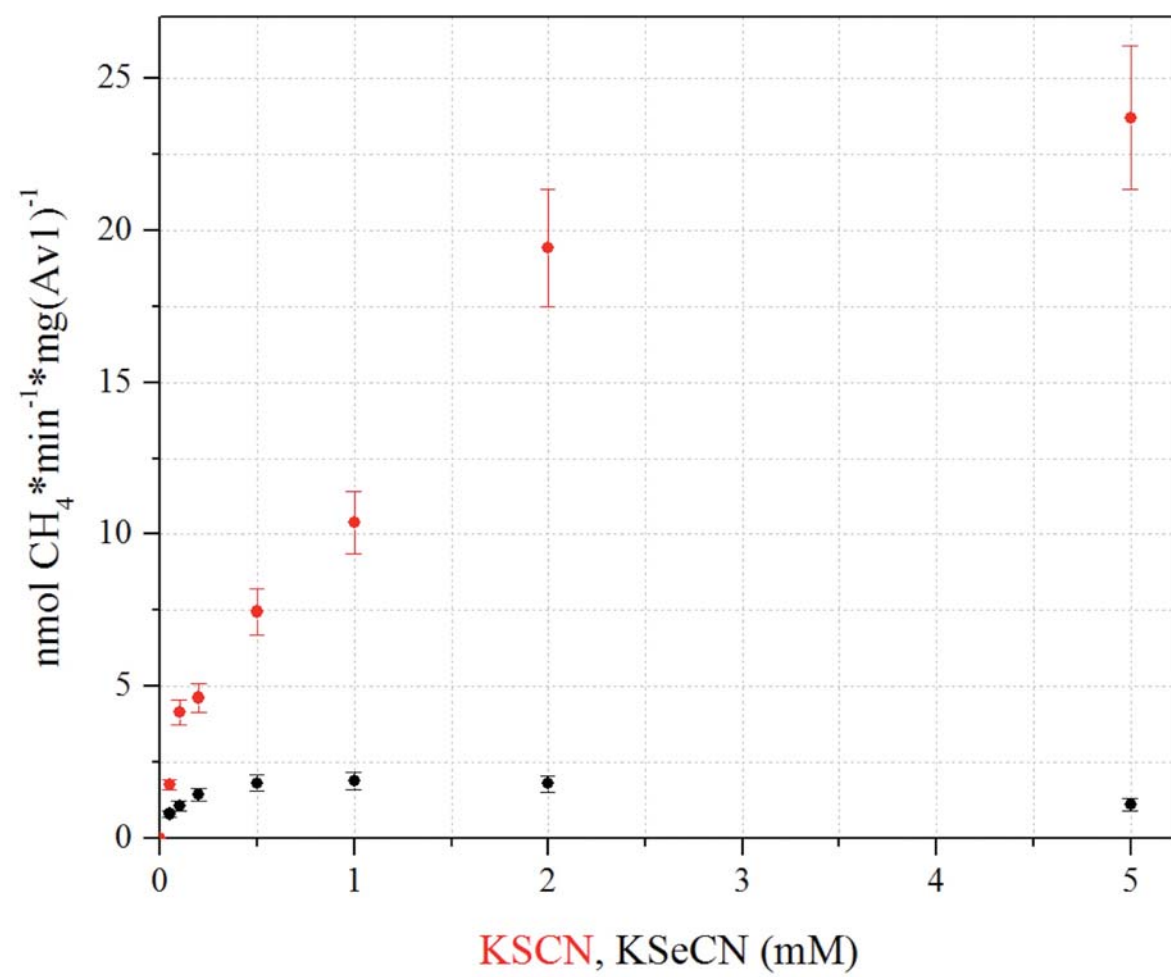

Supplement: supp [file elife-11620-supp-v1.zip]

**Figure 1-figure supplement 3.**

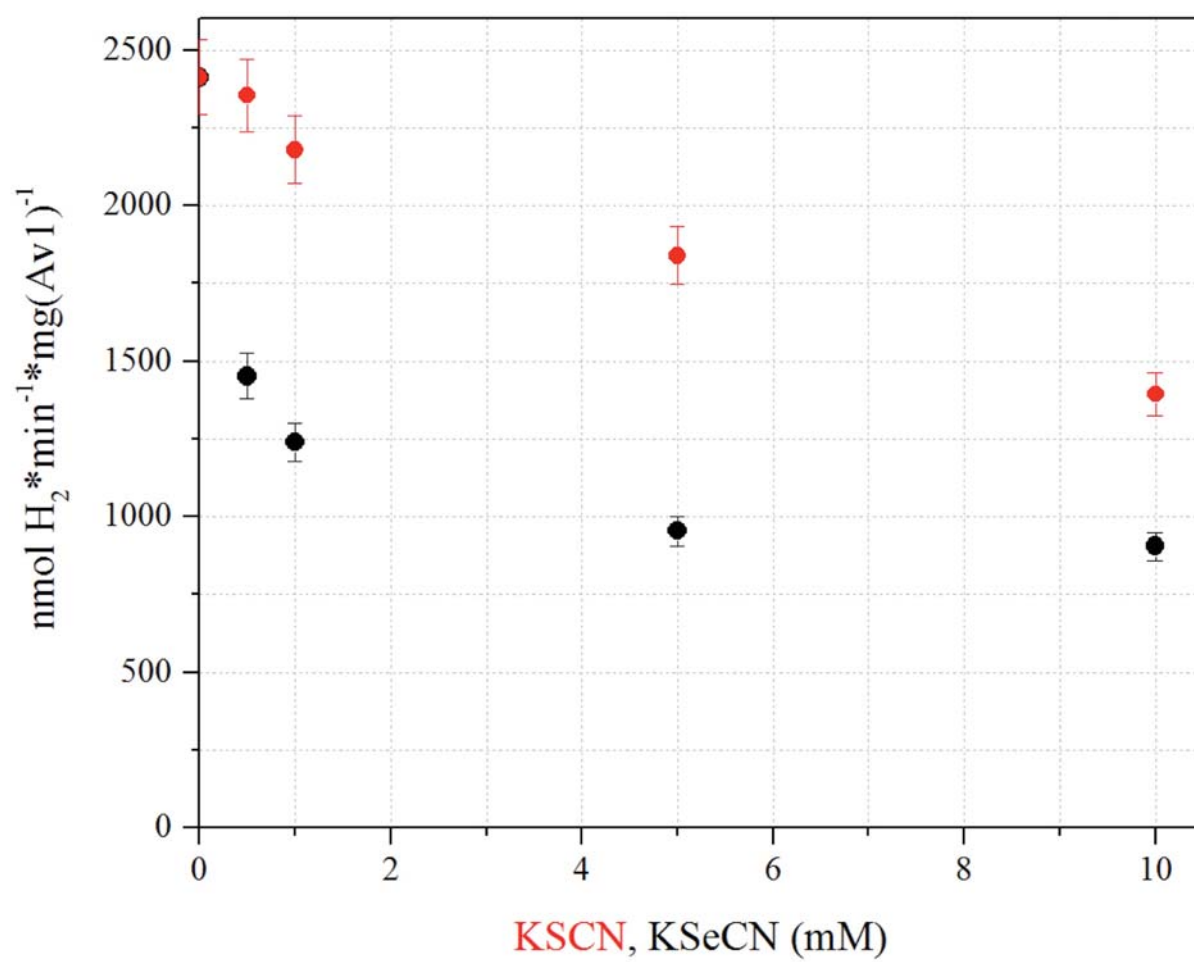

Supplement: supp [file elife-11620-supp-v1.zip]
